# Supplementary material for: Integration of Lupinus angustifolius L. (narrow-leafed lupin) genome maps and comparative mapping within legumes
Source: PubMed Central journal article supplement (PMC4969343; doi:10.1007/s10577-016-9526-8), 2016-05-11
Supplement: 10577_2016_9526_MOESM1_ESM.pdf [file 10577_2016_9526_MOESM1_ESM.pdf]

Integration of *Lupinus angustifolius* L. (narrow-leafed lupin) genome maps and comparative mapping within legumes

### Chromosome Research

Katarzyna Wyrwa, Michał Książkiewicz, Anna Szczepaniak, Karolina Susek, Jan Podkowiński, Barbara Naganowska

Institute of Plant Genetics of the Polish Academy of Sciences, Strzeszyńska 34, Poznań 60-479, Poland

Email: kwyr@igr.poznan.pl; Telephone: (+48 61) 65 50 217; Fax: (+48 61) 65 50 301

**Online Resource 1.** Characterization of sequence-defined probes used for *L. angustifolius* nuclear genome library screening.

| Probe name | Accession number of probe sequence | Accession number of sequences used for primer design | Primers                                                                     | T <sub>m</sub> <sup>a</sup> | Probe length (bp) |
|------------|------------------------------------|------------------------------------------------------|-----------------------------------------------------------------------------|-----------------------------|-------------------|
| ENOD40     | KU678333                           | AF352375                                             | F:CTCACACTCCACCACTTCCAACAGT<br>R:ACTGAAGAGAAACATATTCTAATCACCTGC             | 56°C                        | 372               |
| NOD26      | KU678335                           | L12257                                               | F: CWGYTKCWRTWGCTCATGCTTT<br>R: CAACRATGGAKCCRAGRAGCTG                      | 54°C                        | 200               |
| NOD45      | KU678332                           | L12388                                               | F:AACACTATGATTTGGAAAGAAAGAGAATAGGTG<br>R:AACATTATACTAACTTCAAAGACTAGCATTGTGG | 56°C                        | 900               |
| AAT-P2     | KU678334                           | L29258                                               | F: TACTCGAACCCACCTGTCCACG<br>R:TTTCAACCCCAAGGTTACAAAATTCCTAAGG              | 58°C                        | 904               |

<sup>a</sup>T<sub>m</sub>, annealing temperature.
